# Supplementary material
Source: HighWire-hosted journal article supplement (https://www.haematologica.org/content/suppl/2017/02/01/haematol.2016.155069)
Supplement: 2016.155069.BEZERRA_SUPPL.pdf [file 2016.155069.BEZERRA_SUPPL.pdf]

**Association between the TP53 Arg72Pro polymorphism and clinical outcomes in acute myeloid leukemia**

---

*Matheus F. Bezerra,<sup>1</sup> Juan L. Coelho-Silva,<sup>2</sup> Jessica C. Nascimento,<sup>1</sup> Mariana T. Benicio,<sup>3</sup> Cintia R. Rocha,<sup>1</sup> Cintia G. Machado,<sup>4</sup> Eduardo M. Rego,<sup>3</sup> Marcos A. Bezerra,<sup>2</sup> Antonio R. Lucena-Araujo<sup>2</sup> and Eduardo I. Beltrão<sup>1,5</sup>*

<sup>1</sup>Keizo Asami Immunopathology Laboratory, Federal University of Pernambuco, Recife; <sup>2</sup>Department of Genetics, Federal University of Pernambuco, Recife; <sup>3</sup>Department of Internal Medicine, Medical School of Ribeirao Preto, Ribeirao Preto; <sup>4</sup>Department of Internal Medicine, Hematology and Hemotherapy Foundation of Pernambuco, Recife and <sup>5</sup>Department of Biochemistry, Federal University of Pernambuco, Recife, Brazil

Correspondence: [araujoarl@hotmail.com](mailto:araujoarl@hotmail.com)  
doi:10.3324/haematol.2016.155069

Supplemental Table 1. Univariate and multivariate analysis for overall survival.

| End point        | Model Variables                                                                  | Model 1 |        |         | Model 2 |        |         | Model 3 |         |         | Model 4 |        |         |      |      |      |         |
|------------------|----------------------------------------------------------------------------------|---------|--------|---------|---------|--------|---------|---------|---------|---------|---------|--------|---------|------|------|------|---------|
|                  |                                                                                  | HR      | 95% CI | P-value | HR      | 95% CI | P-value | HR      | 95% CI  | P-value | HR      | 95% CI | P-value |      |      |      |         |
| Overall survival | <b>TP53 Arg72Pro polymorphism:</b><br>Pro/Pro vs non-Pro/Pro                     | 0.59    | 0.37   | 0.95    | 0.032   | 0.63   | 0.39    | 1.02    | 0.065   | 0.61    | 0.33    | 1.33   | 0.12    | 0.66 | 0.37 | 1.17 | 0.163   |
|                  | <b>Age (years):</b><br>continuous variable                                       |         |        |         |         | 1.02   | 1.01    | 1.03    | < 0.001 | 1.01    | 0.99    | 1.02   | 0.119   | 1.01 | 0.99 | 1.49 | 0.213   |
|                  | <b>Cytogenetic risk stratification:</b><br>adverse vs intermediate vs favourable |         |        |         |         |        |         |         |         | 1.24    | 0.85    | 1.77   | 0.24    | 1.02 | 0.63 | 1.65 | 0.915   |
|                  | <b>Leukocyte counts (x10<sup>9</sup>/L):</b><br>continuous variable              |         |        |         |         |        |         |         |         |         |         |        |         | 1.09 | 1.05 | 1.14 | < 0.001 |

NOTE: Hazard ratios (HR) > 1 or < 1 indicate an increased or decreased risk, respectively, of an event for the first category listed.
